# Supplementary material
Source: Springer Nature journal article supplement (https://www.springermedizin.de/resource/supplementary/12985_2010_967_MOESM7_ESM.pdf/9608846)

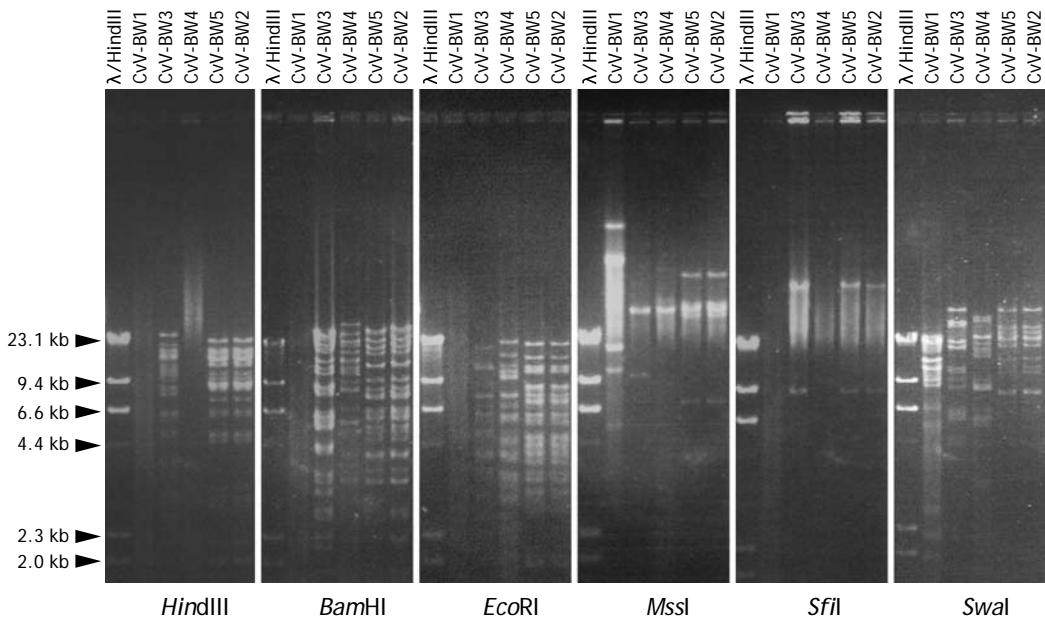

Supplement: MOESM7 [file 9608846]
